# Supplementary material for: Angle resolved ion scattering spectroscopy at surfaces of pure liquids: topography and orientation of molecules
Source: Royal Society of Chemistry journal article supplement (doi:10.1039/b504133c), 2005-01-01
Supplement: b504133c.pdf [file b504133c.pdf]

## Electronic Supplementary Information

The ratio between the energy loss and the depth is calculated with the algorithm:

$$\begin{aligned}
 E_i^{\text{in}} &= E_{i-1}^{\text{in}} - \frac{\Delta d}{\cos(\theta + 12^\circ)} \cdot \text{Sp}(E_{i-1}^{\text{in}}) \text{ with } i = 1 \text{ to } n \\
 E_0^{\text{in}} &= E_0 \\
 d &= n \cdot \Delta d \\
 E_0^{\text{in}} &= k_1 \cdot E_n^{\text{in}} - Q_{\text{in}} \\
 E_j^{\text{out}} &= E_{j-1}^{\text{out}} - \frac{\Delta d}{\cos(\theta)} \cdot \text{Sp}(E_{j-1}^{\text{out}}) \text{ with } j = 1 \text{ to } n
 \end{aligned} \tag{1}$$

where

$E_0$ : primary energy of the projectile

$E_i^{\text{in}}$ : energy of the projectile after passing the  $i$ th layer on the way into the bulk

$\Delta d$ : thickness of the  $n$  layer

$d$ : depth

$E_0^{\text{out}}$ : energy of the projectile after back scattering

$k$ : kinematic factor of the energy loss during back scattering<sup>7</sup>

$E_i^{\text{out}}$ : energy of the projectile after passing the  $j$ th layer on the way back to the surface

$\text{Sp}$ : stopping power

$\theta$ : angle between the surface normal and the direction to the detector, where  $78^\circ - \theta$  is the angle between the direction of the impinging ions and the surface, *the angle of incidence*
